# Supplementary material for: The nuclear electric quadrupole moment of copper
Source: Royal Society of Chemistry journal article supplement (doi:10.1039/c4cp00706a), 2014-01-01
Supplement: c4cp00706a1.pdf [file c4cp00706a1.pdf]

**Table S1** – Experimental equilibrium bond lengths (Å) given by the cited references and T1 diagnostic values obtained during our coupled cluster calculations.

| Molecules           | r(O-C)  | r(Y-Cu) | r(Cu-X)  | T1    |
|---------------------|---------|---------|----------|-------|
| CuH <sup>a</sup>    | -       | -       | 1.46263  | 0.060 |
| CuF <sup>a</sup>    | -       | -       | 1.74493  | 0.064 |
| CuCl <sup>a</sup>   | -       | -       | 2.051183 | 0.047 |
| CuBr <sup>a</sup>   | -       | -       | 2.17344  | 0.038 |
| CuI <sup>a</sup>    | -       | -       | 2.338324 | 0.036 |
| ArCuF <sup>b</sup>  | -       | 2.219   | 1.753    | 0.042 |
| ArCuCl <sup>b</sup> | -       | 2.2706  | 2.0501   | 0.037 |
| ArCuBr <sup>b</sup> | -       | 2.2883  | 2.1728   | 0.032 |
| KrCuF <sup>c</sup>  | -       | 2.31801 | 1.7536   | 0.037 |
| KrCuCl <sup>c</sup> | -       | 2.36286 | 2.0525   | 0.032 |
| XeCuF <sup>d</sup>  | -       | 2.4327  | 1.754    | 0.036 |
| XeCuCl <sup>d</sup> | -       | 2.471   | 2.058    | 0.032 |
| OCCuF <sup>e</sup>  | 1.1307  | 1.7639  | 1.7364   | 0.044 |
| OCCuCl <sup>e</sup> | 1.12755 | 1.79447 | 2.053419 | 0.041 |
| OCCuBr <sup>e</sup> | 1.12721 | 1.80238 | 2.17871  | 0.036 |
| OCCuI <sup>f</sup>  | 1.1269  | 1.8154  | 2.3563   | 0.037 |

- a) K. P. Huber and G. Herzberg, *Molecular Spectra and Molecular Structure Constants*, New York: Van Nostrand, 1979.
- b) C. J. Evans and M. C. L. Gerry, *J. Chem. Phys.*, 2000, **112**, 9363-9374.
- c) J. M. Michaud, S. A. Cooke and M. C. L. Gerry, *Inorg. Chem*, 2004, **43**, 3871-3881.
- d) J. M. Michaud and M. C. L. Gerry, *J. Am. Chem. Soc.*, 2006, **128**, 7613-7621.
- e) N. R. Walker and M. C. L. Gerry, *Inorg. Chem*, 2001, **40**, 6158-6166.
- f) S. G. Batten and A. C. Legon, *Chem. Phys. Lett.*, 2006, **422**, 192-197.
